# Supplementary material for: Ribosomal History Reveals Origins of Modern Protein Synthesis
Source: PubMed Central journal article supplement (PMC3299690; doi:10.1371/journal.pone.0032776), 2012-03-12
Supplement: pone.0032776.s003.pdf [file pone.0032776.s003.pdf]

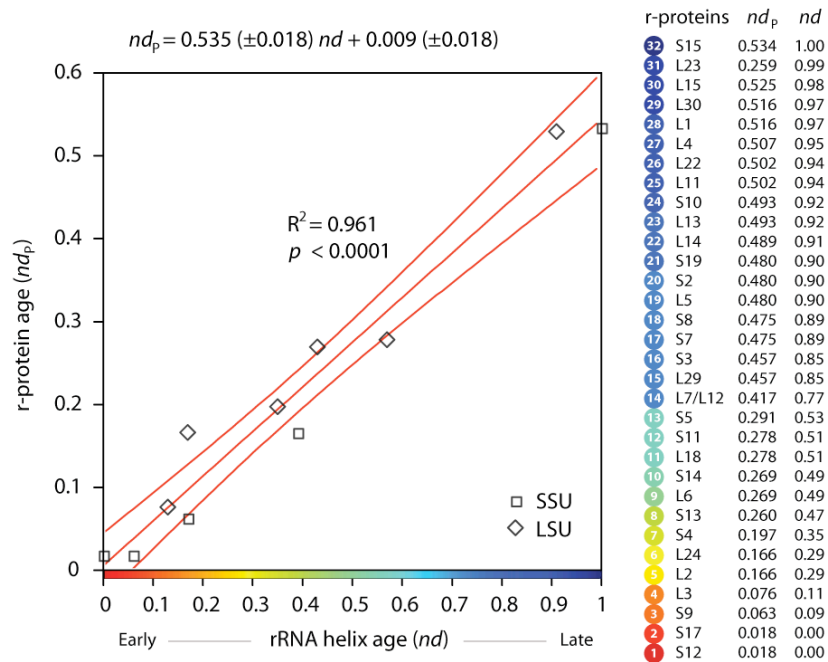

**Figure S3. Correspondence between the age of r-proteins and the age of first interacting rRNA helix.** The FSFs of r-proteins represents a small subset of FSFs that are known with  $nd_p$  values within the range 0.018-0.534. A method of interpolation was used to determine the age of r-proteins ( $nd_p$ ) with reference to the age of the interacting rRNA helix ( $nd$ ). Figure shows that the protein interactions follow a linear correspondence with rRNA helices. Starting from the oldest protein and first interacting helix, the correspondence is maintained until the point of the second transition after which there is a rapid burst in the discovery of new FSFs. Hence the pattern of  $nd_p$  and  $nd$  correspondence is interrupted. To determine the correspondence between the youngest r-proteins and the youngest rRNA helices, we interpolated their  $nd_p$  values on the slope.  $nd_p$  and  $nd$  values are given for all universal r-proteins.
