# Supplementary material for: Ribosomal History Reveals Origins of Modern Protein Synthesis
Source: PubMed Central journal article supplement (PMC3299690; doi:10.1371/journal.pone.0032776), 2012-03-12
Supplement: pone.0032776.s005.pdf [file pone.0032776.s005.pdf]

(1) Start with Universal tree of Molecules from Shape Characters (102 sequences)

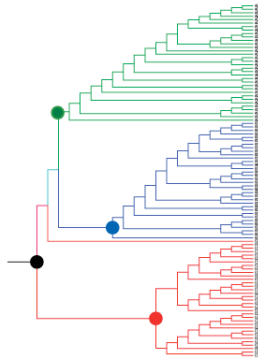

(2) Convert DCSE alignment to FASTA alignment

```

A U U[C C - G G U]U - - - - G A[U - C C U]-[G - C C G G]- A[G G C - - C A U - - U G C U]- -
G G A[G A - G U U]U - - - - G A[U - C C U]-[G - G C U C]- A[G G C U{G}A A - - C G C U]- -
U A C[C U - G G U]U - - - - G A[U - C C U]-[G - C A G]U U[A G U{- C}A U A - - U G C U]- -
- - - - - 1 - - - - - 2 - - - - - 1' - - - - - 3- - - - -
    
```

```

AUUCC-GGUU-----GAU-CCU-G-CCGG-AGGC--CAU--UGCU
GGAGA-GUUU-----GAU-CCU-G-GCUC-AGGGCUGAA--CGCU
UACCU-GGUU-----GAU-CCU-G-CCAGUUAGU-CAUA--UGCU
    
```

Statistical selection of best-fit model of nucleotide substitution using jModelTest

To reconstruct the Universal Ancestor sequence ●, ideally an alignment of 102 sequences in (1) should be used. However, due to significant sequence divergence between Archaea (A), Bacteria (B) and Eukarya (E) a good alignment was not possible. Hence the ancestor of each superkingdom was first reconstructed from corresponding alignments and subtrees.

(3) Reconstruct ancestor sequence of Archaea ●, Bacteria ● and Eukarya ● using Maximum Likelihood methods in PAUP\* and convert it back to DCSE format. Then align structural elements manually.

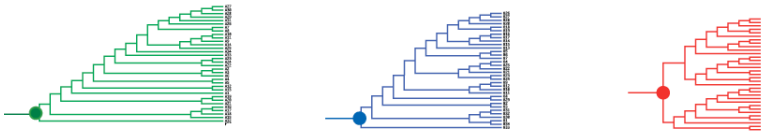

(4) Use these reconstructed sequences to obtain the Universal Ancestor ●

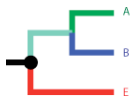

(5) Reconstruct the length of Stems, Bulges and Loops for ● and use this to determine the size of stems, bulges and loops of the structure of hypothetical ancestor. Correct the sequence and structure accordingly.

**Figure S5. Overview of the reconstruction of hypothetical ancestral sequences and structures from rRNA.** The flow chart describes the methods and data used to reconstruct ancestral rRNA molecules for remote homology analyses.
