# Supplementary material for: Ribosomal History Reveals Origins of Modern Protein Synthesis
Source: PubMed Central journal article supplement (PMC3299690; doi:10.1371/journal.pone.0032776), 2012-03-12
Supplement: pone.0032776.s010.pdf [file pone.0032776.s010.pdf]

**Table S2. Order of establishment of intersubunit bridges and the rRNA helices and r-proteins involved in bridge interactions.** R is RNA, P is protein, h is SSU helix, H is LSU helix. Data from Gao et al. [74] and Kietrys et al. [75].

| Age | Bridge | Type       | SSU           |           | LSU                |           |
|-----|--------|------------|---------------|-----------|--------------------|-----------|
|     |        |            | rRNA          | r-Protein | rRNA               | r-Protein |
| 1   | B5     | R-R<br>R-P | h44<br>h44    |           | H27, H62, H64, H71 | L14       |
| 2   | B2b    | R-R        | h24, h45      |           | H67, H69, H71      |           |
| 3   | B2c    | R-R        | h24, h27      |           | H66, H67           |           |
| 4   | B6     | R-R<br>R-P | h44<br>h44    |           | H62                | L19       |
| 5   | B7b    | R-P        | h22, h23, h24 |           |                    | L2        |
| 6   | B1a    | P-R        |               | S13, S19  | H38                |           |
| 7   | B4     | R-R<br>P-R | h20           | S15       | H34<br>H34         |           |
| 8   | B7a    | R-R        | h23           |           | H68                |           |
| 9   | B3     | R-R        | h44           |           | H71                |           |
| 10  | B2a    | R-R        | h44           |           | H69                |           |
| 11  | B1b    | P-P        |               | S13       |                    | L5        |
| 12  | B8     | R-P        | h14           |           |                    | L14, L19  |
