# Supplementary material for: Ribosomal History Reveals Origins of Modern Protein Synthesis
Source: PubMed Central journal article supplement (PMC3299690; doi:10.1371/journal.pone.0032776), 2012-03-12
Supplement: pone.0032776.s011.pdf [file pone.0032776.s011.pdf]

**Table S3. FSFs of r-protein domains and their relative age. Highlighted cells are universal.**

| SCOP ID | SCOP <i>ccs</i> | r-protein     | <i>nd</i> | <i>nd norm</i> | SCOP name                                            |
|---------|-----------------|---------------|-----------|----------------|------------------------------------------------------|
| 50249   | b.40.4          | <b>L2 -N</b>  | 0.018     | 0.00           | Nucleic acid-binding proteins                        |
| 50249   | b.40.4          | <b>S12</b>    | 0.018     | 0.00           | Nucleic acid-binding proteins                        |
| 50249   | b.40.4          | <b>S17</b>    | 0.018     | 0.00           | Nucleic acid-binding proteins                        |
| 54211   | d.14.1          | <b>S5 -C</b>  | 0.063     | 0.09           | r-Protein S5 domain 2-like                           |
| 54211   | d.14.1          | <b>S9</b>     | 0.063     | 0.09           | r-Protein S5 domain 2-like                           |
| 50447   | b.43.3          | <b>L3</b>     | 0.076     | 0.11           | Translation proteins                                 |
| 50104   | b.34.5          | <b>L2 -C</b>  | 0.166     | 0.29           | Translation proteins SH3-like domain                 |
| 50104   | b.34.5          | <b>L19</b>    | 0.166     | 0.29           | Translation proteins SH3-like domain                 |
| 50104   | b.34.5          | <b>L24</b>    | 0.166     | 0.29           | Translation proteins SH3-like domain                 |
| 55174   | d.66.1          | <b>S4</b>     | 0.197     | 0.35           | Alpha-L RNA-binding motif                            |
| 54814   | d.52.3          | <b>S3 -N</b>  | 0.206     | 0.37           | Prokaryotic type KH domain (KH-domain type II)       |
| 46946   | a.156.1         | <b>S13</b>    | 0.260     | 0.47           | S13-like H2TH domain                                 |
| 56053   | d.141.1         | <b>L6</b>     | 0.269     | 0.49           | r-Protein L6                                         |
| 57716   | g.39.1          | <b>S14</b>    | 0.269     | 0.49           | Glucocorticoid receptor-like (DNA-binding domain)    |
| 53137   | c.55.4          | <b>L18</b>    | 0.278     | 0.50           | Translational machinery components                   |
| 53137   | c.55.4          | <b>S11</b>    | 0.278     | 0.50           | Translational machinery components                   |
| 57829   | g.41.8          | <b>L32p</b>   | 0.283     | 0.51           | Zn-binding r-proteins                                |
| 57829   | g.41.8          | <b>L33p</b>   | 0.283     | 0.51           | Zn-binding r-proteins                                |
| 143800  | d.325.1         | <b>L28</b>    | 0.291     | 0.53           | L28p-like                                            |
| 143800  | d.325.1         | <b>L31p</b>   | 0.291     | 0.53           | L28p-like                                            |
| 54768   | d.50.1          | <b>S5 -N</b>  | 0.291     | 0.53           | dsRNA-binding domain-like                            |
| 55315   | d.79.3          | <b>L7ae</b>   | 0.296     | 0.54           | L30e-like                                            |
| 55653   | d.99.1          | <b>L9 -C</b>  | 0.350     | 0.64           | r-Protein L9 C-domain                                |
| 46992   | a.7.6           | <b>S20</b>    | 0.354     | 0.65           | r-Protein S20                                        |
| 74731   | a.144.2         | <b>L20</b>    | 0.381     | 0.70           | r-Protein L20                                        |
| 143034  | d.301.1         | <b>L35p</b>   | 0.395     | 0.73           | L35p-like                                            |
| 48300   | a.108.1         | <b>L7</b>     | 0.417     | 0.77           | r-Protein L7/12, oligomerisation (N-terminal) domain |
| 48300   | a.108.1         | <b>L12</b>    | 0.417     | 0.77           | r-Protein L7/12, oligomerisation (N-terminal) domain |
| 57840   | g.42.1          | <b>L36</b>    | 0.417     | 0.77           | r-Protein L36                                        |
| 64263   | d.188.1         | <b>L17</b>    | 0.422     | 0.78           | Prokaryotic r-protein L17                            |
| 54995   | d.58.14         | <b>S6</b>     | 0.422     | 0.78           | r-Protein S6                                         |
| 54565   | d.27.1          | <b>S16</b>    | 0.422     | 0.78           | r-Protein S16                                        |
| 55658   | d.100.1         | <b>L9 -N</b>  | 0.430     | 0.80           | L9 N-domain-like                                     |
| 141091  | b.155.1         | <b>L21p</b>   | 0.430     | 0.80           | L21p-like                                            |
| 46911   | a.4.8           | <b>S18</b>    | 0.435     | 0.81           | r-Protein S18                                        |
| 46561   | a.2.2           | <b>L29</b>    | 0.457     | 0.85           | r-Protein L29 (L29p)                                 |
| 54821   | d.53.1          | <b>S3 -C</b>  | 0.457     | 0.85           | r-Protein S3 C-terminal domain                       |
| 47973   | a.75.1          | <b>S7</b>     | 0.475     | 0.89           | r-Protein S7                                         |
| 56047   | d.140.1         | <b>S8</b>     | 0.475     | 0.89           | r-Protein S8                                         |
| 55282   | d.77.1          | <b>L5</b>     | 0.480     | 0.90           | RL5-like                                             |
| 52313   | c.23.15         | <b>S2</b>     | 0.480     | 0.90           | r-Protein S2                                         |
| 54570   | d.28.1          | <b>S19</b>    | 0.480     | 0.90           | r-Protein S19                                        |
| 50193   | b.39.1          | <b>L14</b>    | 0.489     | 0.91           | r-Protein L14                                        |
| 52161   | c.21.1          | <b>L13</b>    | 0.493     | 0.92           | r-Protein L13                                        |
| 54686   | d.41.4          | <b>L16p</b>   | 0.493     | 0.92           | r-Protein L16p/L10e                                  |
| 54999   | d.58.15         | <b>S10</b>    | 0.493     | 0.92           | r-Protein S10                                        |
| 46906   | a.4.7           | <b>L11 -C</b> | 0.502     | 0.94           | r-Protein L11, C-terminal domain                     |
| 54747   | d.47.1          | <b>L11 -N</b> | 0.502     | 0.94           | r-Protein L11/L12e N-terminal domain                 |
| 54843   | d.55.1          | <b>L22</b>    | 0.502     | 0.94           | r-Protein L22                                        |

|        |         |              |       |      |                               |
|--------|---------|--------------|-------|------|-------------------------------|
| 52166  | c.22.1  | <b>L4</b>    | 0.507 | 0.95 | r-Protein L4                  |
| 50715  | b.53.1  | <b>L25</b>   | 0.507 | 0.95 | r-Protein L25-like            |
| 56808  | e.24.1  | <b>L1</b>    | 0.516 | 0.97 | r-Protein L1                  |
| 55129  | d.59.1  | <b>L30</b>   | 0.516 | 0.97 | r-Protein L30p/L7e            |
| 52080  | c.12.1  | <b>L15</b>   | 0.525 | 0.98 | r-Proteins L15p and L18e      |
| 54189  | d.12.1  | <b>L23</b>   | 0.529 | 0.99 | r-Proteins S24e, L23 and L15e |
| 47060  | a.16.1  | <b>S15</b>   | 0.534 | 1.00 | S15/NS1 RNA-binding domain    |
| 160369 | d.58.62 | <b>L10</b>   | N/A   |      | r-Protein L10-like            |
| 64659  | j.84.1  | <b>L10</b>   | N/A   |      | r-Protein L10                 |
| 144321 | j.118.1 | <b>L34p</b>  | N/A   |      | r-Protein L34p                |
| 58322  | j.9.1   | <b>S THX</b> | N/A   |      | 30S r-Protein THX             |
