# Supplementary material for: Ribosomal History Reveals Origins of Modern Protein Synthesis
Source: PubMed Central journal article supplement (PMC3299690; doi:10.1371/journal.pone.0032776), 2012-03-12
Supplement: pone.0032776.s012.pdf [file pone.0032776.s012.pdf]

**Table S4. Age of rRNA helices ( $nd$ ) interacting with universal r-proteins and the number of interacting rRNA residues.**

| FSF     | r-Protein | $nd_p$ | rRNA contact |         | $nd$  | Number of interacting bases in helices |    |
|---------|-----------|--------|--------------|---------|-------|----------------------------------------|----|
|         |           |        | Brimacombe   | ErRD    |       |                                        |    |
| b.40.4  | S12       | 0.018  | h44          | S49     | 0.000 | 2                                      | 47 |
|         |           |        | h3           | S3      | 0.333 | 8                                      |    |
|         |           |        | h27          | S31     | 0.444 | 8                                      |    |
|         |           |        | h19          | S22     | 0.593 | 6                                      |    |
|         |           |        | h5           | S5      | 0.593 | 3                                      |    |
|         |           |        | h18          | S19     | 0.630 | 20                                     |    |
| b.40.5  | S17       | 0.018  | h11          | S12     | 0.056 | 19                                     | 39 |
|         |           |        | h7           | S8      | 0.130 | 10                                     |    |
|         |           |        | h27          | S31     | 0.444 | 2                                      |    |
|         |           |        | h20          | S23     | 0.593 | 7                                      |    |
|         |           |        | h23/ab2      | S23/ab2 | N/A   | 1                                      |    |
| d.14.2  | S9        | 0.063  | h39          | S43     | 0.167 | 8                                      | 54 |
|         |           |        | h30          | S34     | 0.315 | 4                                      |    |
|         |           |        | h41          | S45     | 0.315 | 8                                      |    |
|         |           |        | h43          | S48     | 0.481 | 16                                     |    |
|         |           |        | h40          | S44     | 0.630 | 3                                      |    |
|         |           |        | h29          | S33     | 0.685 | 4                                      |    |
|         |           |        | h38          | S42     | 0.870 | 11                                     |    |
| b.43.3  | L3        | 0.076  | H96          | H3      | 0.130 | 12                                     | 92 |
|         |           |        | H101         | J3      | 0.167 | 4                                      |    |
|         |           |        | H94          | H1      | 0.278 | 26                                     |    |
|         |           |        | H73          | G1      | 0.296 | 12                                     |    |
|         |           |        | H90          | G17     | 0.296 | 14                                     |    |
|         |           |        | H61          | E19     | 0.500 | 14                                     |    |
|         |           |        | H100         | J2      | 0.741 | 10                                     |    |
| b.34.4  | L2        | 0.166  | H74          | G2      | 0.296 | 6                                      | 79 |
|         |           |        | H75          | G3      | 0.296 | 8                                      |    |
|         |           |        | H33          | D8      | 0.407 | 11                                     |    |
|         |           |        | H93          | G20     | 0.593 | 8                                      |    |
|         |           |        | H35a         | D11     | 0.611 | 6                                      |    |
|         |           |        | H67          | E26     | 0.648 | 8                                      |    |
|         |           |        | H79          | G5      | 0.667 | 2                                      |    |
| H66     | E24       | 0.759  | 30           |         |       |                                        |    |
| b.34.5  | L24       | 0.166  | H7           | B6      | 0.389 | 13                                     | 19 |
|         |           |        | H19          | B19     | 0.556 | 6                                      |    |
| d.66.1  | S4        | 0.197  | h17          | S18     | 0.352 | 9                                      | 50 |
|         |           |        | h5           | S5      | 0.593 | 4                                      |    |
|         |           |        | h18          | S19     | 0.630 | 16                                     |    |
|         |           |        | h16          | S17     | 0.648 | 15                                     |    |
|         |           |        | h23a         | S26     | 1.000 | 3                                      |    |
|         |           |        | h23/ab1      | S23/ab1 | N/A   | 3                                      |    |
| a.156.1 | S13       | 0.260  | h30          | S34     | 0.315 | 15                                     | 32 |
|         |           |        | h41          | S45     | 0.315 | 3                                      |    |
|         |           |        | h42          | S47     | 0.574 | 11                                     |    |
|         |           |        | h31          | S35     | 0.722 | 3                                      |    |
| d.141.1 | L6        | 0.269  | H91          | G18     | 0.426 | 7                                      | 23 |

|         |            |       |         |         |       |    |    |
|---------|------------|-------|---------|---------|-------|----|----|
|         |            |       | H97     | H4      | 0.593 | 8  |    |
|         |            |       | H95     | H2      | 0.611 | 8  |    |
| g.39.1  | <b>S14</b> | 0.269 | h43     | S48     | 0.481 | 4  | 29 |
|         |            |       | h42     | S47     | 0.574 | 2  |    |
|         |            |       | h32     | S36     | 0.630 | 3  |    |
|         |            |       | h31     | S35     | 0.722 | 7  |    |
|         |            |       | h36     | S40     | 0.722 | 4  |    |
|         |            |       | h38     | S42     | 0.870 | 7  |    |
|         |            |       | h37/b1  | S37/b1  |       | 2  |    |
| c.55.4  | <b>L18</b> | 0.278 | H38     | D14     | 0.037 | 2  | 10 |
|         |            |       | H85     | G11     | 0.574 | 2  |    |
|         |            |       | H87     | G14     | 0.870 | 6  |    |
| c.55.4  | <b>S11</b> | 0.278 | h23     | S25     | 0.185 | 12 | 30 |
|         |            |       | h23     | S25     | 0.185 | 9  |    |
|         |            |       | h24     | S27     | 0.222 | 6  |    |
|         |            |       | h45     | S50     | 0.407 | 3  |    |
| d.14.1  | <b>S5</b>  | 0.291 | h28     | S32     | 0.259 | 4  | 21 |
|         |            |       | h1      | S1      | 0.704 | 5  |    |
|         |            |       | h36     | S40     | 0.722 | 5  |    |
|         |            |       | h35     | S39     | 0.759 | 4  |    |
|         |            |       | h35     | S39     | 0.759 | 3  |    |
| c.21.1  | <b>L13</b> | 0.417 | H25     | C1      | 0.185 | 6  | 42 |
|         |            |       | H94     | H1      | 0.278 | 6  |    |
|         |            |       | H42     | D18     | 0.630 | 22 |    |
|         |            |       | H72     | F1      | 0.685 | 8  |    |
| a.2.2   | <b>L29</b> | 0.457 | H7      | B6      | 0.389 | 13 | 13 |
| d.53.1  | <b>S3</b>  | 0.457 | h34     | S38     | 0.093 | 24 | 41 |
|         |            |       | h16     | S17     | 0.648 | 1  |    |
|         |            |       | h36     | S40     | 0.722 | 7  |    |
|         |            |       | h35     | S39     | 0.759 | 4  |    |
|         |            |       | h38     | S42     | 0.870 | 3  |    |
|         |            |       | h37     | S41     | 0.870 | 2  |    |
| a.75.1  | <b>S7</b>  | 0.475 | h28     | S32     | 0.259 | 8  | 62 |
|         |            |       | h30     | S34     | 0.315 | 10 |    |
|         |            |       | h41     | S45     | 0.315 | 16 |    |
|         |            |       | h43     | S48     | 0.481 | 18 |    |
|         |            |       | h42     | S47     | 0.574 | 7  |    |
|         |            |       | h29     | S33     | 0.685 | 3  |    |
| d.140.1 | <b>S8</b>  | 0.475 | h26     | S29     | 0.204 | 4  | 47 |
|         |            |       | h25     | S28     | 0.611 | 15 |    |
|         |            |       | h23/ab1 | S23/ab1 |       | 28 |    |
| d.77.1  | <b>L5</b>  | 0.480 | H84     | G11     | 0.574 | 16 | 16 |
| c.23.15 | <b>S2</b>  | 0.480 | h34     | S38     | 0.093 | 1  | 19 |
|         |            |       | h26     | S29     | 0.204 | 2  |    |
|         |            |       | h25     | S28     | 0.611 | 6  |    |
|         |            |       | h36     | S40     | 0.722 | 3  |    |
|         |            |       | h35     | S39     | 0.759 | 2  |    |
|         |            |       | h37     | S41     | 0.870 | 5  |    |
| d.28.1  | <b>S19</b> | 0.480 | h30     | S34     | 0.315 | 10 | 41 |
|         |            |       | h42     | S47     | 0.574 | 8  |    |
|         |            |       | h32     | S36     | 0.630 | 4  |    |
|         |            |       | h31     | S35     | 0.722 | 6  |    |

|         |            |       |        |        |       |    |    |
|---------|------------|-------|--------|--------|-------|----|----|
|         |            |       | h37/b1 | S37/b1 |       | 13 |    |
| b.39.1  | <b>L14</b> | 0.489 | H96    | H3     | 0.130 | 4  | 24 |
|         |            |       | H71    | E29    | 0.648 | 4  |    |
|         |            |       | H92    | G19    | 0.722 | 4  |    |
|         |            |       | H61    | E19    | 0.500 | 4  |    |
|         |            |       | H95    | H2     | 0.611 | 8  |    |
| d.41.4  | <b>L16</b> | 0.493 | H89    | G16    | 0.296 | 8  | 45 |
|         |            |       | H39    | D15    | 0.370 | 14 |    |
|         |            |       | H42    | D18    | 0.630 | 8  |    |
|         |            |       | H81    | G7     | 0.667 | 4  |    |
|         |            |       | H80    | G6     | 0.704 | 5  |    |
|         |            |       | H40    | D16    | 0.907 | 6  |    |
| d.58.15 | <b>S10</b> | 0.493 | h41a   | S46    | 0.315 | 4  | 21 |
|         |            |       | h43    | S48    | 0.481 | 3  |    |
|         |            |       | h31    | S35    | 0.722 | 6  |    |
|         |            |       | h38    | S42    | 0.870 | 8  |    |
| d.47.1  | <b>L11</b> | 0.502 | H45    | D20    | 0.407 | 14 | 18 |
|         |            |       | H44    | D19    | 0.630 | 4  |    |
| d.55.1  | <b>L22</b> | 0.502 | H73    | G1     | 0.296 | 9  | 42 |
|         |            |       | H2     | B1     | 0.389 | 10 |    |
|         |            |       | H61    | E19    | 0.500 | 4  |    |
|         |            |       | H50    | E6     | 0.519 | 7  |    |
|         |            |       | H26    | D1     | 0.556 | 4  |    |
|         |            |       | H99    | J1     | 0.722 | 2  |    |
|         |            |       | H3     | B2     | 0.778 | 4  |    |
|         |            |       | H35    | D10    | 0.944 | 2  |    |
| c.22.1  | <b>L4</b>  | 0.507 | H27    | D2     | 0.167 | 10 | 69 |
|         |            |       | H46a   | D22    | 0.407 | 24 |    |
|         |            |       | H19    | B19    | 0.556 | 10 |    |
|         |            |       | H26    | D1     | 0.556 | 6  |    |
|         |            |       | H28    | D3     | 0.556 | 7  |    |
|         |            |       | H22    | B21    | 0.796 | 12 |    |
| e.24.1  | <b>L1</b>  | 0.516 | H76    | G4     | 0.037 | 4  | 4  |
| d.59.1  | <b>L30</b> | 0.516 | H41    | D17    | 0.037 | 17 | 41 |
|         |            |       | H38    | D14    | 0.037 | 14 |    |
|         |            |       | H46    | D21    | 0.556 | 7  |    |
|         |            |       | H41    | D16    | 0.907 | 3  |    |
| c.12.1  | <b>L15</b> | 0.525 | H88    | G15    | 0.426 | 16 | 60 |
|         |            |       | H37    | D13    | 0.444 | 14 |    |
|         |            |       | H12    | B12    | 0.519 | 8  |    |
|         |            |       | H11    | B10    | 0.556 | 3  |    |
|         |            |       | H36    | D12    | 0.685 | 12 |    |
|         |            |       | H29    | D4     | 0.926 | 4  |    |
|         |            |       | H12    | B11    | 0.963 | 3  |    |
| d.12.1  | <b>L23</b> | 0.529 | H51    | E7     | 0.907 | 4  | 4  |
| a.16.1  | <b>S15</b> | 0.534 | h26    | S29    | 0.204 | 2  | 29 |
|         |            |       | h22    | S24    | 0.333 | 17 |    |
|         |            |       | h20    | S23    | 0.593 | 5  |    |
|         |            |       | h23a   | S26    | 1.000 | 5  |    |
| j.84.1  | <b>L10</b> | N/A   | H42    | D18    | 0.630 | 8  | 8  |
