# Supplementary material for: Ribosomal History Reveals Origins of Modern Protein Synthesis
Source: PubMed Central journal article supplement (PMC3299690; doi:10.1371/journal.pone.0032776), 2012-03-12
Supplement: pone.0032776.s013.pdf [file pone.0032776.s013.pdf]

**Table S5. List of species from which sequences of both SSU and LSU rRNA were used for the reconstruction of the trees of rRNA helices shown in Figure 2. A total of 31 sequences from each superkingdom of life was chosen to avoid sampling bias. Due to the limited availability of LSU sequences, 2 archaeal sequences were used in duplicate to keep the number of taxa equal in superkingdoms.**

| <b>Archaea</b>                              | <b>Bacteria</b>                   | <b>Eukarya</b>                  |
|---------------------------------------------|-----------------------------------|---------------------------------|
| <i>Acidianus brierleyi</i>                  | <i>Agrobacterium tumefaciens</i>  | <i>Acorus gramineus</i>         |
| <i>Acidianus infernus</i>                   | <i>Alcaligenes faecalis</i>       | <i>Aedes albopictus</i>         |
| <i>Aeropyrum pernix</i>                     | <i>Aquifex aeolicus</i>           | <i>Arabidopsis thaliana</i>     |
| <i>Aeropyrum pernix</i>                     | <i>Bacillus subtilis</i>          | <i>Caenorhabditis elegans</i>   |
| <i>Archaeoglobus fulgidus</i>               | <i>Bordetella pertussis</i>       | <i>Candida albicans</i>         |
| <i>Desulfurococcus mobilis</i>              | <i>Borrelia burgdorferi</i>       | <i>Citrus aurantium</i>         |
| <i>Haloarcula marismortui</i>               | <i>Bradyrhizobium japonicum</i>   | <i>Crithidia fasciculata</i>    |
| <i>Haloarcula marismortui</i>               | <i>Campylobacter coli</i>         | <i>Cryptosporidium parvum</i>   |
| <i>Halobacterium halobium</i>               | <i>Chlamydia pneumoniae</i>       | <i>Dictyostelium discoideum</i> |
| <i>Halobacterium marismortui</i>            | <i>Chlamydomonas reinhardtii</i>  | <i>Drosophila melanogaster</i>  |
| <i>Halococcus morrhuae</i>                  | <i>Chlorobium limicola</i>        | <i>Entamoeba histolytica</i>    |
| <i>Haloferax mediterranei</i>               | <i>Clostridium botulinum</i>      | <i>Euglena gracilis</i>         |
| <i>Methanobacterium thermoautotrophicum</i> | <i>Coxiella burnetii</i>          | <i>Gelidium americanum</i>      |
| <i>Methanococcus jannaschii A</i>           | <i>Escherichia coli G</i>         | <i>Giardia ardeae</i>           |
| <i>Methanococcus jannaschii B</i>           | <i>Fibrobacter succinogenes</i>   | <i>Gnetum urens</i>             |
| <i>Methanococcus vanniellii</i>             | <i>Flavobacterium odoratum</i>    | <i>Guillardia theta</i>         |
| <i>Methanospirillum hungatei</i>            | <i>Haemophilus influenzae D</i>   | <i>Homo sapiens</i>             |
| <i>Methanospirillum sp.</i>                 | <i>Helicobacter pylori B</i>      | <i>Hyphochytrium catenoides</i> |
| <i>Natronobacterium magadii</i>             | <i>Lactobacillus amylolyticus</i> | <i>Mucor racemosus</i>          |
| <i>Pyrobaculum islandicum</i>               | <i>Nannocystis exedens</i>        | <i>Nosema apis</i>              |
| <i>Pyrococcus abyssi</i>                    | <i>Neisseria gonorrhoeae</i>      | <i>Onikusa pristoides</i>       |
| <i>Pyrococcus horikoshii</i>                | <i>Pirellula marina</i>           | <i>Oryza sativa</i>             |
| <i>Stygiolobus azoricus</i>                 | <i>Rickettsia prowazekii</i>      | <i>Palmaria palmata</i>         |
| <i>Sulfolobus acidocaldarius</i>            | <i>Serpulina hyodysenteriae</i>   | <i>Physarum polycephalum</i>    |
| <i>Sulfolobus shibatae</i>                  | <i>Staphylococcus aureus</i>      | <i>Plasmodium falciparum</i>    |
| <i>Sulfolobus solfataricus</i>              | <i>Stigmatella aurantiaca</i>     | <i>Saccharomyces cerevisiae</i> |
| <i>Thermococcus celer</i>                   | <i>Synechocystis sp.</i>          | <i>Styela plicata</i>           |
| <i>Thermophilum pendens</i>                 | <i>Thermotoga maritima</i>        | <i>Tetrahymena pyriformis</i>   |
| <i>Thermoplasma acidophilum</i>             | <i>Thermus thermophilus</i>       | <i>Trepomonas agilis</i>        |
| <i>Pyrobaculum neutrophilum</i>             | <i>Treponema pallidum</i>         | <i>Trypanosoma brucei</i>       |
| <i>Thermococcus acidaminovorans</i>         | <i>Vibrio cholerae</i>            | <i>Xenopus laevis</i>           |
