# Supplementary material for: Ribosomal History Reveals Origins of Modern Protein Synthesis
Source: PLoS One. 2012 Mar 12;7(3):e32776. doi: 10.1371/journal.pone.0032776 (PMC3299690; doi:10.1371/journal.pone.0032776)
Supplement: Table S1 — rRNA helices and their associated functions. (PDF) [file pone.0032776.s009.pdf]

**Table S1. rRNA helices and their associated functions**

[illegible]

[illegible]

[illegible]
